# Supplementary material for: SARS-CoV-2 infection triggers paracrine senescence and leads to a sustained senescence-associated inflammatory response
Source: PubMed Central journal article supplement (PMC10154207; doi:10.1038/s43587-022-00170-7), 2022-01-25
Supplement: 43587_2022_170_MOESM1_ESM.pdf [file 43587_2022_170_MOESM1_ESM.pdf]

---

**Supplementary information**

---

**SARS-CoV-2 infection triggers paracrine senescence and leads to a sustained senescence-associated inflammatory response**

---

In the format provided by the authors and unedited

## Supplementary information

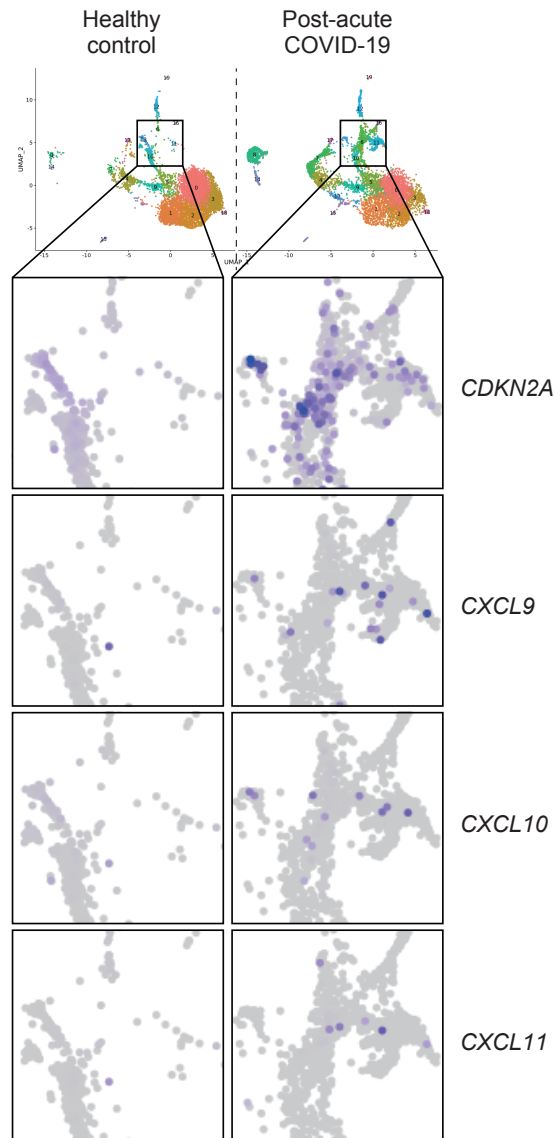

### Supplementary Fig. 1

#### Persistent inflammatory response in patients with COVID-19.

Single-cell RNA transcriptomic analysis of lung tissue from patients with severe COVID-19<sup>28</sup>. Epithelial cells population of Uniform Manifold Approximation and Projection (UMAP) plots was divided into healthy controls (n=2) and COVID-19 patients (n=3), and The distribution of cells expressing the cellular senescence marker (*CDKN2A* gene) and the SASP factor gene, which are also expressed in the Syrian hamster model of SARS-CoV-2 infection.

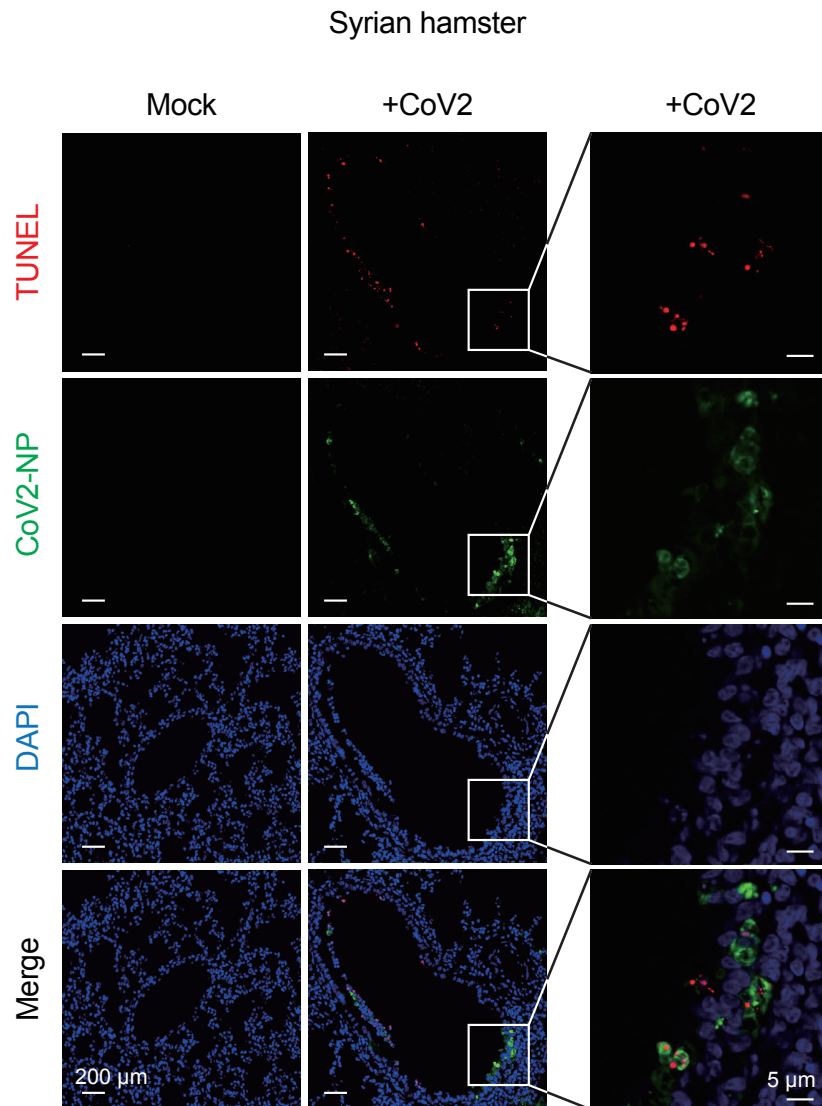

**Supplementary Fig. 2**

**SARS-CoV-2 infection induces cell death.**

Syrian hamsters infected Mock (n=3) or SARS-CoV-2 (n=3) were euthanized on days 5 post-infection and lung sections were subjected to TUNEL staining for SARS-CoV-2 N protein (CoV2-NP [green]), TUNEL [red], and DAPI [blue]. Representative images were shown.

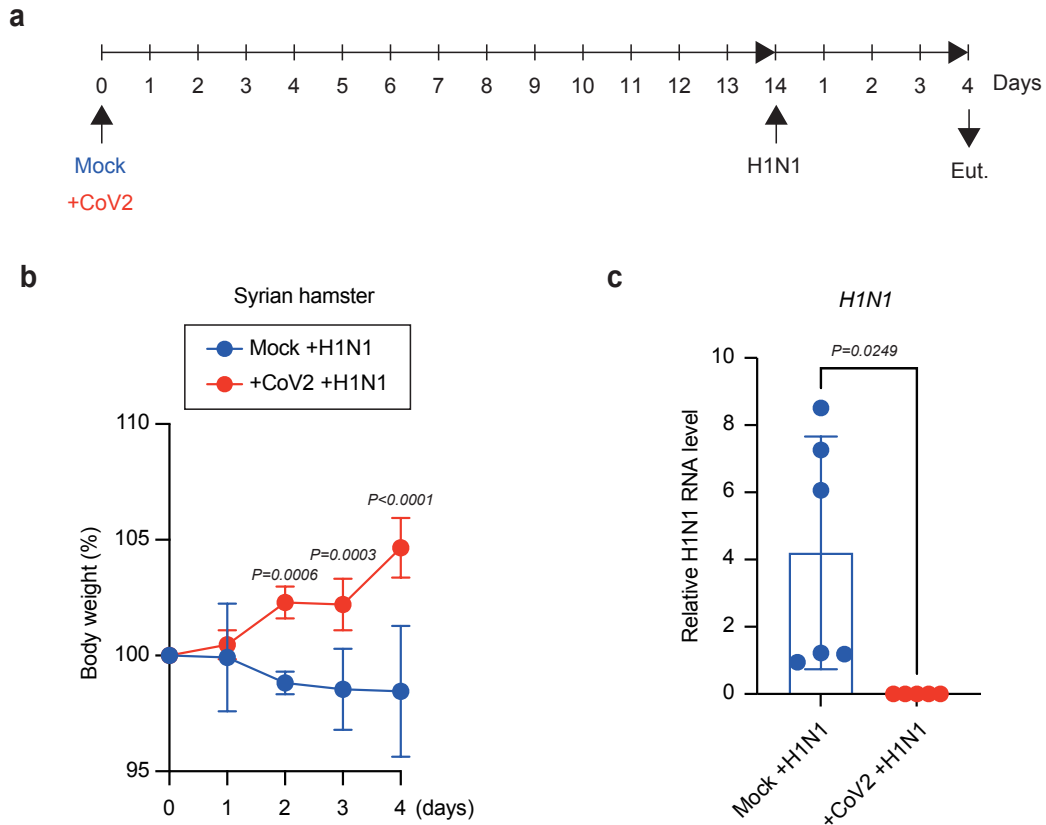

### Supplementary Fig. 3

#### SARS-CoV-2 infection prevents superinfection of influenza virus.

**a-c.** Syrian hamsters were intranasally inoculated with SARS-CoV-2 (B.1.1.7)  $5.6 \times 10^5$  PFU (in 80  $\mu$ L), medium (mock). After 14 days post-infection of SARS-CoV-2, mock or SARS-CoV-2 infected hamsters were intranasally inoculated influenza A (H1N1) pdm09  $5.6 \times 10^5$  PFU (in 80  $\mu$ L). Hamsters infected with mock followed by H1N1 (mock+H1N1; n=6) and SARS-CoV-2 followed by H1N1 (CoV2+H1N1; n=6). The timeline of the experiment was shown (**a**). The body weight was monitored until day 4 post H1N1 infection (**b**). These hamsters were euthanized on day 4 after H1N1 infection, and the expression of H1N1 genomic RNA was analyzed using RT-qPCR. (**c**). For all graphs, error bars indicate mean  $\pm$  standard deviation (s.d.). Statistical significance was determined two-way ANOVA followed by sidak's multiple comparison test in (**b**), and with two-tailed unpaired Student's t-test in (**c**).

**Supplementary Table. 1**

| RT-qPCR Primer Information                    |                                     |
|-----------------------------------------------|-------------------------------------|
| Primer ID                                     | Sequence                            |
| <i>human ACE2 Forward</i>                     | 5'- CGAAGCCGAAGACCTGTTCTA -3'       |
| <i>human ACE2 Reverse</i>                     | 5'- GGGCAAGTGTGGACTGTTT -3'         |
| <i>human p16 Forward</i>                      | 5'- ACCAGAGGCAGTAACCATGC -3'        |
| <i>human p16 Reverse</i>                      | 5'- AAGTTTCCCAGGTTTCTCA -3'         |
| <i>human p21 Forward</i>                      | 5'- AGCGATGGAAC TTCACTTTG -3'       |
| <i>human p21 Reverse</i>                      | 5'- CGAAGTCACCCTCCAGTGGT -3'        |
| <i>human LMNB1 Forward</i>                    | 5'- GATTGCCAGTTGGAAGCCT -3'         |
| <i>human LMNB1 Reverse</i>                    | 5'- TGGTCTCGTTAATCTCCTTTCATACA -3'  |
| <i>human TNFa Forward</i>                     | 5'- GCCCCAGAGGGAAGAGTTCCCCA -3'     |
| <i>human TNFa Reverse</i>                     | 5'- GCT TGAGGGTTTGCTACAACATGGGC -3' |
| <i>human IL6 Forward</i>                      | 5'- CCAGGAGCCCAGCTATGAAC -3'        |
| <i>human IL6 Reverse</i>                      | 5'- CCCAGGGAGAAGGCAACTG -3'         |
| <i>human IFN<math>\beta</math> Forward</i>    | 5'- AAACATCATGAGCAGTCTGCA -3'       |
| <i>human IFN<math>\beta</math> Reverse</i>    | 5'- AGGAGATCTTCAGTTTCGGAGG -3'      |
| <i>human IL1B Forward</i>                     | 5'- CTGTCTGCGTGTGAAAGA -3'          |
| <i>human IL1B Reverse</i>                     | 5'- TTGGTAATTTTGGGATCTACA -3'       |
| <i>human IL8 Forward</i>                      | 5'- AAGGAAAAC TGGGTGCAGAG -3'       |
| <i>human IL8 Reverse</i>                      | 5'- ATTGCATCTGGCAACCCTAC -3'        |
| <i>human <math>\beta</math>-actin Forward</i> | 5'- TGGATCAGCAAGCAGGATATG -3'       |
| <i>human <math>\beta</math>-actin Reverse</i> | 5'- GCATTTGCGGTGGACGAT -3'          |
| <i>human GAPDH Forward</i>                    | 5'- CAACTACATGGTTTACATGTTT -3'      |
| <i>human GAPDH Reverse</i>                    | 5'- GCCAGTGGACTCCACGAC -3'          |
| <i>syrian hamster p16 Forward</i>             | 5'- AGAGTTTCGGGCTTTGCT -3'          |
| <i>syrian hamster p16 Reverse</i>             | 5'- CTACTTGGGTGTTGCCATC -3'         |
| <i>syrian hamster p21 Forward</i>             | 5'- TTGTTTCGGAGGCACCACCAT -3'       |
| <i>syrian hamster p21 Reverse</i>             | 5'- TCGAAGTTCACCGTTCTCG -3'         |
| <i>syrian hamster Ccl17 Forward</i>           | 5'- GTGCTGCCTGGAGATCTTCA -3'        |
| <i>syrian hamster Ccl17 Reverse</i>           | 5'- TGGCATCCCTGGGACACT -3'          |
| <i>syrian hamster Irfng Forward</i>           | 5'- TGTTGCTCTGCCTCACTCAGG -3'       |
| <i>syrian hamster Irfng Reverse</i>           | 5'- AAGACGAGTCCCCTCCATTC -3'        |
| <i>syrian hamster Cxcl9 Forward</i>           | 5'- ACTCTGCTCTGCCATGAAGT -3'        |
| <i>syrian hamster Cxcl9 Reverse</i>           | 5'- TTCCTTATGACTAGGGTTCCTTGA -3'    |
| <i>syrian hamster Cxcl10 Forward</i>          | 5'- GCCATTCATCCACAGTTGACA -3'       |
| <i>syrian hamster Cxcl10 Reverse</i>          | 5'- CATGGTGCTGACAGTGGAGTCT -3'      |
| <i>syrian hamster Cxcl11 Forward</i>          | 5'- CCGCCTCATACGGAAATGT -3'         |
| <i>syrian hamster Cxcl11 Reverse</i>          | 5'- AAGACAGAAGTTGGGCTCG -3'         |
| <i>syrian hamster Gapdh Forward</i>           | 5'- TTGTTGCCATCAATGACCCCTT -3'      |
| <i>syrian hamster Gapdh Reverse</i>           | 5'- CGTTCTCAGCCTTGACTGTGCCTT -3'    |
| <i>mouse <math>\beta</math>-actin Forward</i> | 5'- GATGACCCAGATCATGTTTGA -3'       |
| <i>mouse <math>\beta</math>-actin Reverse</i> | 5'- GGAGAGCATAGCCCTCGTAG -3'        |
| <i>mouse Gapdh Forward</i>                    | 5'- CAACTACATGGTCTACATGTTT -3'      |
| <i>mouse Gapdh Reverse</i>                    | 5'- CGCCAGTAGACTCCACGAC -3'         |
| <i>mouse p16Ink4a Forward</i>                 | 5'- GAACTCTTTTCGGTCTGATCCC -3'      |
| <i>mouse p16Ink4a Reverse</i>                 | 5'- CGAATCTGCACCGTAGTTGA -3'        |
| <i>mouse p19Arf Forward</i>                   | 5'- GCCGCACCGGAATCCT -3'            |
| <i>mouse p19Arf Reverse</i>                   | 5'- TTGAGCAGAAGAGCTGCTACGT -3'      |
| <i>mouse Irfnb Forward</i>                    | 5'- CAGCTCCAAGAAGGACGAAC -3'        |
| <i>mouse Irfnb Reverse</i>                    | 5'- GGCAGTGTAACCTTCTGTCAT -3'       |
| <i>mouse Irfng Forward</i>                    | 5'- ATGAACGCTACACACTGCATC -3'       |
| <i>mouse Irfng Reverse</i>                    | 5'- CCATCCTTTTGCCAGTTCCTC -3'       |
| <i>mouse Cxcl9 Forward</i>                    | 5'- CCTAGTGATAAGGAATGCACGATG -3'    |
| <i>mouse Cxcl9 Reverse</i>                    | 5'- CTAGGCAGGTTTGATCTCCGTTT -3'     |
| <i>mouse Cxcl10 Forward</i>                   | 5'- ATCATCCCTGCGAGCCTATCCT -3'      |
| <i>mouse Cxcl10 Reverse</i>                   | 5'- GACCTTTTTTGGCTAAACGCTTTC -3'    |
| <i>mouse Mmp10 Forward</i>                    | 5'- TGCTGCCTATGAGGCTCACAAC -3'      |
| <i>mouse Mmp10 Reverse</i>                    | 5'- GGAGGAAAACCGAGAGTGTGGA -3'      |
| <i>SARS-CoV-2 N Forward</i>                   | 5'- TTACAAACATTGGCCGCAA -3'         |
| <i>SARS-CoV-2 N Reverse</i>                   | 5'- GCGCGACATTCGAAGAA -3'           |
| <i>SARS-CoV subgenomic N Forward</i>          | 5'- CCAGGTAACAAACCAACCACTTTCG -3'   |
| <i>SARS-CoV subgenomic N Reverse</i>          | 5'- GGTTACTGCCAGTTGAATCTGAGG -3'    |
| <i>H1N1 pdm09 Forward</i>                     | 5'- GGAGCAAAAAGCTTCTACAA -3'        |
| <i>H1N1 pdm09 Reverse</i>                     | 5'- ACTTTGTTGGTTCAGCACTA -3'        |

### Sauce Data of Supplementary figure. 3

| S. Fig. 3b                                      |         |            |            |            |            |
|-------------------------------------------------|---------|------------|------------|------------|------------|
| Body weight (%)                                 |         |            |            |            |            |
| days                                            | 0       | 1          | 2          | 3          | 4          |
| Mock+H1N1                                       | 100     | 98.3298539 | 99.0605428 | 100        | 99.3736952 |
|                                                 | 100     | 99.7918835 | 98.855359  | 96.2539022 | 96.0457856 |
|                                                 | 100     | 99.5014955 | 97.9062812 | 97.4077767 | 97.108674  |
|                                                 | 100     | 104.314995 | 98.8133765 | 97.3031284 | 95.0377562 |
|                                                 | 100     | 99.9016716 | 98.9183874 | 100        | 101.966568 |
|                                                 | 100     | 97.6626016 | 99.3902439 | 100.304878 | 101.219512 |
| CoV2+H1N1                                       | 100     | 101.117886 | 101.727642 | 101.626016 | 103.556911 |
|                                                 | 100     | 100.209424 | 102.513089 | 104.293194 | 106.910995 |
|                                                 | 100     | 100.432432 | 102.378378 | 101.513514 | 103.459459 |
|                                                 | 100     | 99.7402597 | 102.467532 | 101.688312 | 105.324675 |
|                                                 | 100     | 100        | 101.354402 | 102.708804 | 104.288939 |
|                                                 | 100     | 101.317365 | 103.353293 | 101.437126 | 104.431138 |
| Adjusted P Value                                | >0.9999 | 0.9711     | 0.0006     | 0.0003     | <0.0001    |
| Two-way ANOVA Šídák's multiple comparisons test |         |            |            |            |            |

| S. Fig. 3c                                 |             |
|--------------------------------------------|-------------|
| Relative (to GAPDH) H1N1 genomic RNA level |             |
| Mock+H1N1                                  | CoV2+H1N1   |
| 7.260153243                                | 2.0215E-08  |
| 8.51496146                                 | 9.10938E-09 |
| 0.946057647                                | 7.60713E-09 |
| 1.189207115                                | 5.41647E-09 |
| 6.062866266                                | 1.43936E-08 |
| 1.222640278                                | ND          |
| Unpaired t test                            | Two-tailed  |
| P value                                    | 0.0249      |
