# Supplementary material for: SARS-CoV-2 infection triggers paracrine senescence and leads to a sustained senescence-associated inflammatory response
Source: PubMed Central journal article supplement (PMC10154207; doi:10.1038/s43587-022-00170-7), 2022-01-25

ACE2

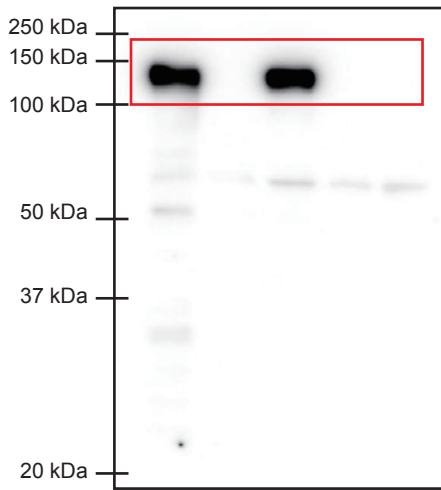

$\beta$ -actin

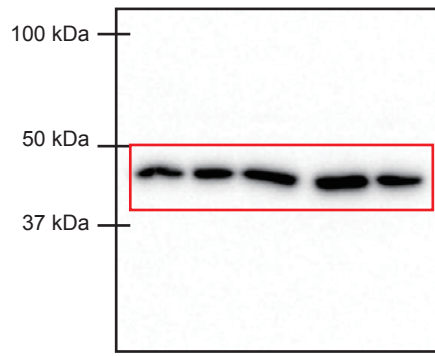

Supplement: 43587_2022_170_MOESM8_ESM.pdf [file 43587_2022_170_MOESM8_ESM.pdf]
